# Supplementary material for: Assessing the Impact of Different Depression Treatment Success Metrics on Organizational Performance
Source: Atypon-hosted journal article supplement (doi:10.1176/appi.ps.202000364), 2021-04-15

**Table S1 – Detailed Organization- and Clinic-Level Characteristics of the Three-, Six-, and Twelve-Month Time Cohorts**

| N (Organization, Clinic, Patient)       | 3-Month Time Cohort* |      |    | 6-Month Time Cohort* |      |    | 12-Month Time Cohort* |      |    |
|-----------------------------------------|----------------------|------|----|----------------------|------|----|-----------------------|------|----|
|                                         | Mean/%               | SD/N | NA | Mean/%               | SD/N | NA | Mean/%                | SD/N | NA |
| <b>Organization-Level</b>               | -                    | -    | -  | -                    | -    | -  | -                     | -    | -  |
| CoCM Clinics – mean (SD)                | 4.1                  | 3.4  | 0  | 3.9                  | 3.3  | 0  | 3.5                   | 3.2  | 1  |
| <b>Clinic-Level</b>                     | -                    | -    | -  | -                    | -    | -  | -                     | -    | -  |
| Monthly CoCM Patient Visits – mean (SD) | 1.3                  | 0.4  | 10 | 1.3                  | 0.4  | 15 | 1.3                   | 0.4  | 32 |
| Urban - % (N)                           | 83                   | 112  | 10 | 83                   | 108  | 15 | 81                    | 92   | 32 |
| FQHC - % (N)                            | 64                   | 86   | 10 | 64                   | 83   | 15 | 67                    | 76   | 32 |
| CoCM Patients – mean (SD)               | 272                  | 340  | 10 | 283                  | 343  | 15 | 321                   | 352  | 32 |
| Age – mean (SD)                         | 44                   | 8    | 10 | 45                   | 7    | 15 | 44                    | 7    | 32 |
| % Female – mean (SD)**                  | 60                   | 17   | 10 | 60                   | 15   | 15 | 62                    | 14   | 32 |
| % Caucasian – mean (SD)**               | 56                   | 28   | 10 | 56                   | 28   | 15 | 55                    | 28   | 32 |

\*Characteristics of the three-, six-, and twelve-month cohorts reflect the baseline characteristics of organizations and clinics included in each respective time cohort.

\*\*Missing gender and race data were imputed.

**Figure S1 - Spearman's Rank-Order Correlation Coefficients at 6-Months**

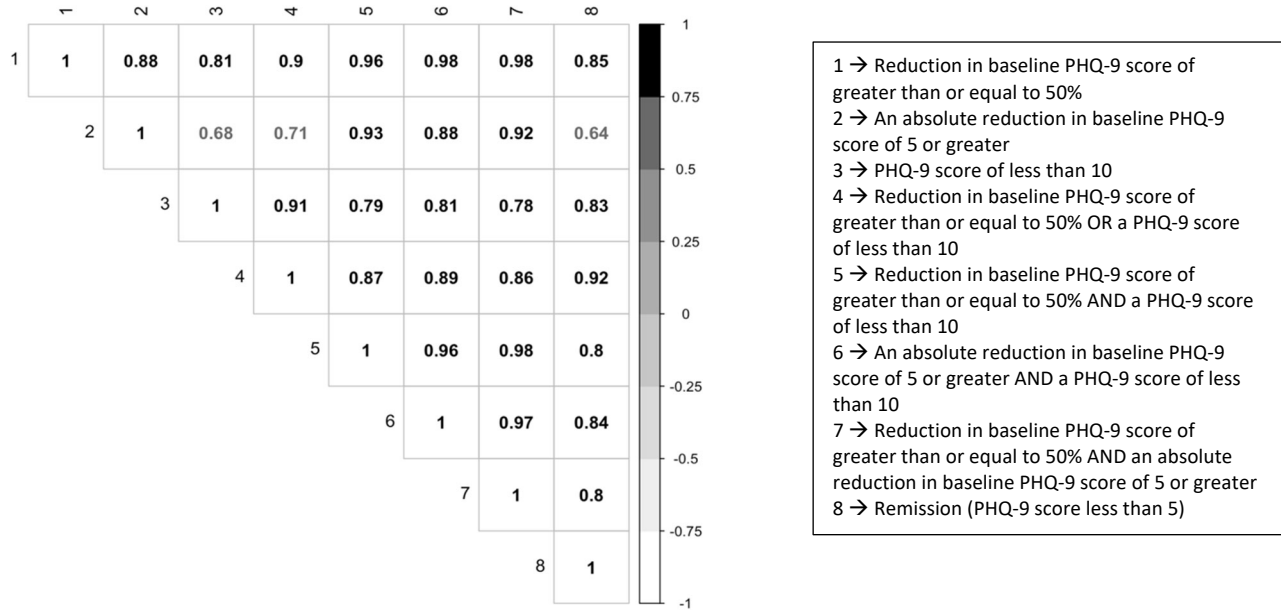

Supplement: appi.ps.202000364.ds001.pdf [file appi.ps.202000364.ds001.pdf]
